# Supplementary material for: One-step photochemical synthesis of gold–polymer nanohybrids with engineered morphologies and catalytic activity
Source: Royal Society of Chemistry journal article supplement (doi:10.1039/d5nr04546k), 2026-01-01
Supplement: d5nr04546k1.pdf [file d5nr04546k1.pdf]

# Supporting Information

## One-Step Photochemical Synthesis of Gold-Polymer Nanohybrids with Engineered Morphologies and Catalytic Activity

Meng-Jie Wu <sup>a</sup>, Reynaldo Carlos K. Montalbo <sup>a</sup>, Chun-Jen Su <sup>b</sup>, Orion Shih <sup>b</sup>, and Hsiung-Lin Tu <sup>a,c,\*</sup>

---

<sup>a</sup> Institute of Chemistry, Academia Sinica, Taipei 115201, Taiwan

<sup>b</sup> National Synchrotron Radiation Research Center, Hsinchu 30076, Taiwan

<sup>c</sup> Genome and Systems Biology Program, Academia Sinica and National Taiwan University, Taipei 10617, Taiwan

\*Corresponding Author: Hsiung-Lin Tu (Email: [hltu@gate.sinica.edu.tw](mailto:hltu@gate.sinica.edu.tw))

**Figure S1-S12**

**Table S1**

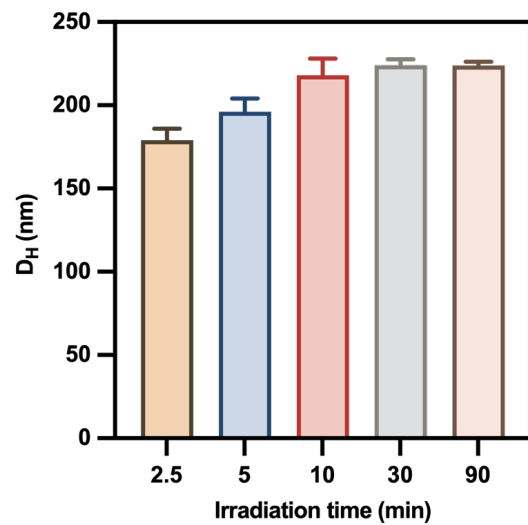

**Figure S1.** Hydrodynamic diameters ( $D_H$ ) of H40 samples synthesized with different irradiation times. Error bars represent standard deviation ( $n = 3$ ).

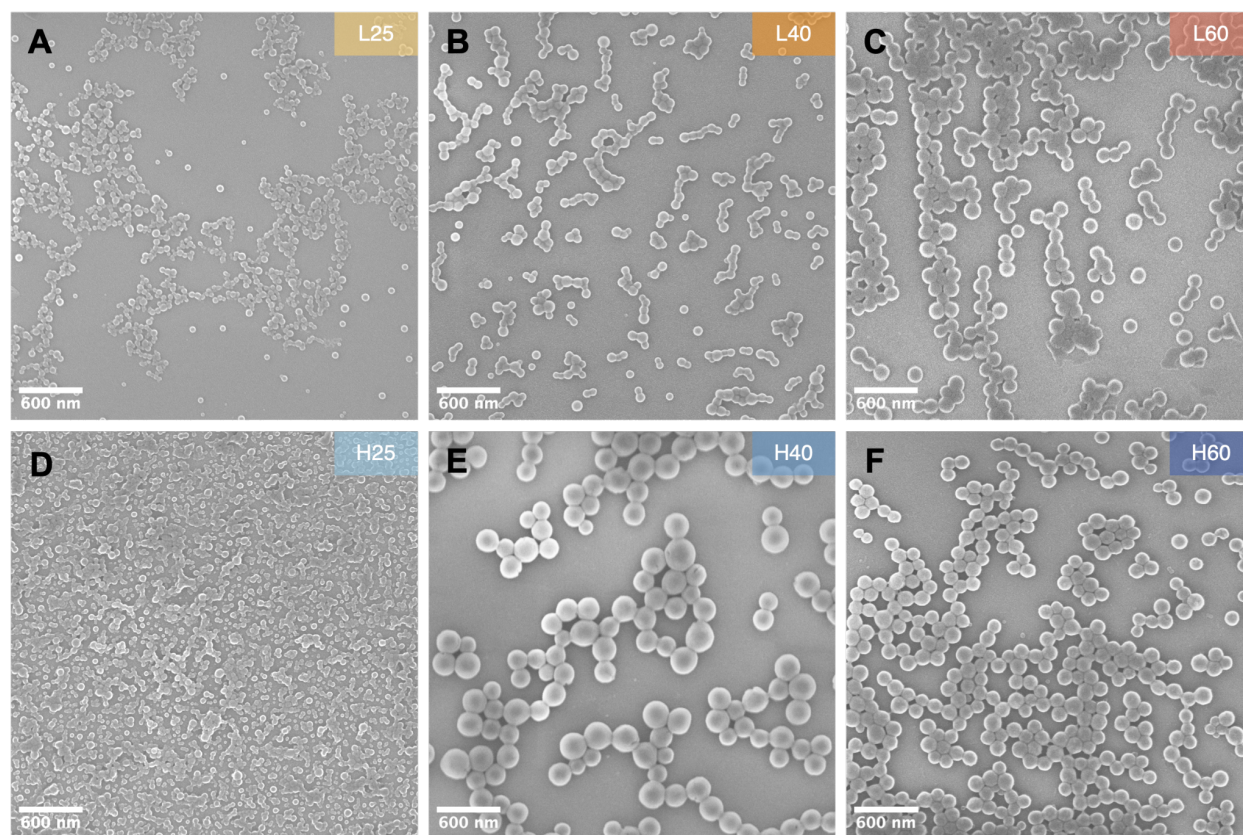

**Figure S2.** SEM images of hybrid nanogels synthesized under different conditions. Panels show (A) L25 (B) L40 (C) L60 (D) H25 (E) H40 (F) H60.

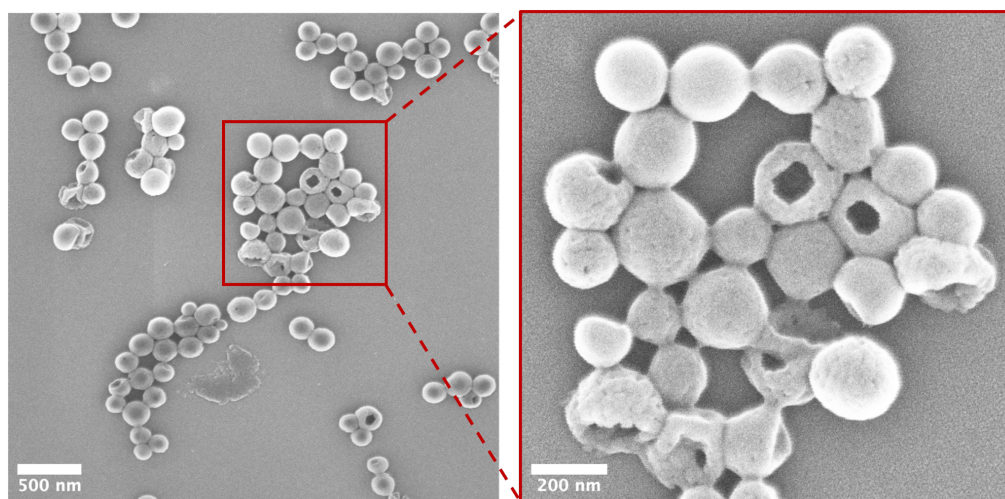

**Figure S3.** SEM images of H40 nanogels showing surface openings.



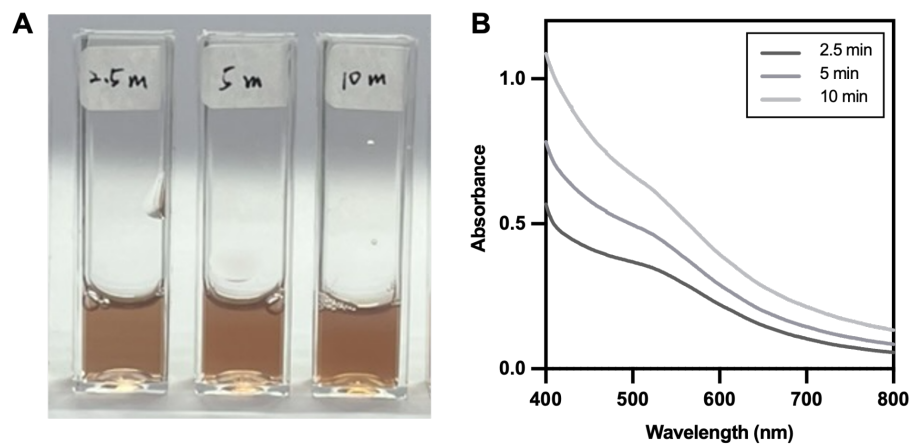

**Figure S4.** (A) Photograph and (B) UV–Vis spectra of as-synthesized H40 nanogels with irradiation times of 2.5, 5, and 10 minutes.

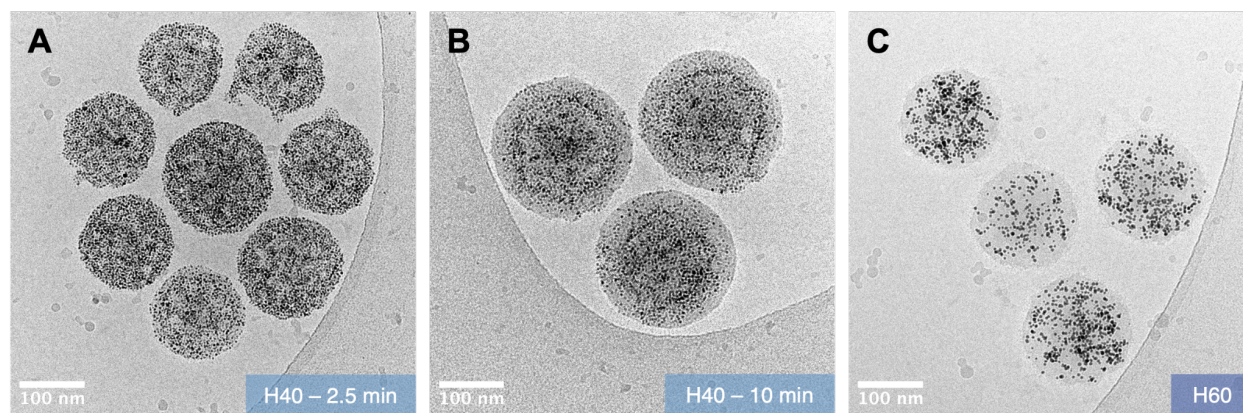

**Figure S5.** Cryo-TEM images of H40 nanogels after irradiation for (A) 2.5 min and (B) 10 min, and (C) H60 nanogels.

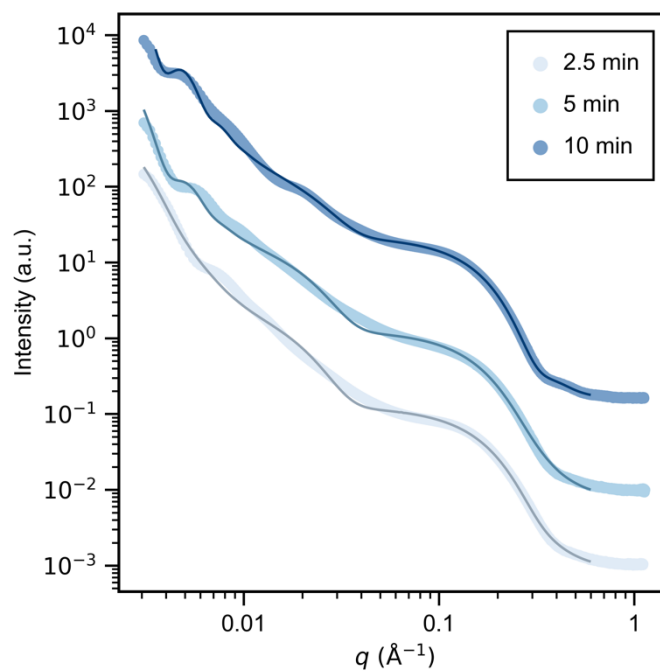

**Figure S6.** SAXS data of H40 at 2.5, 5, and 10 minutes fitted with a combined model consisting of two sphere functions and a Guinier function.

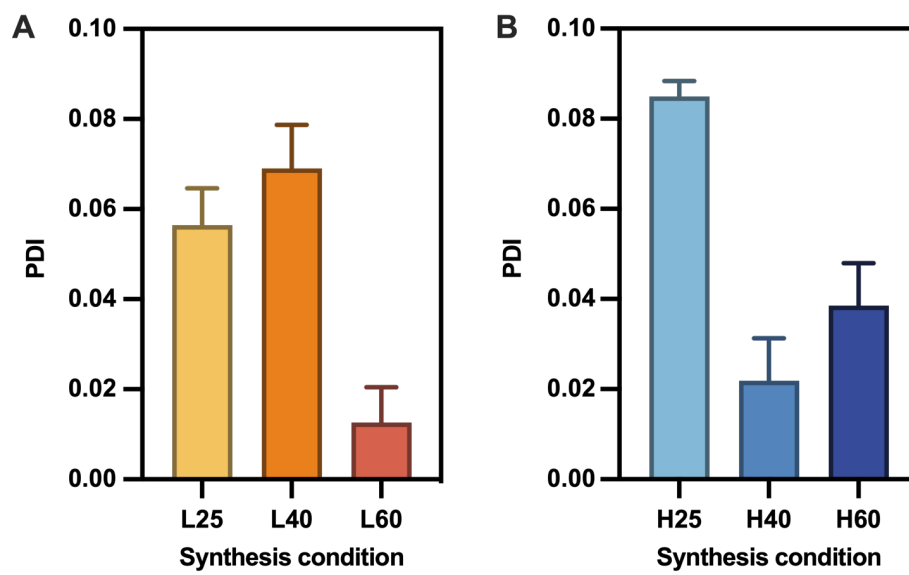

**Figure S7.** Polydispersity index (PDI) of hybrid nanogels determined by DLS. (A) PDI of L-series. (B) PDI of H-series. Error bars represent standard deviation ( $n = 3$ ).

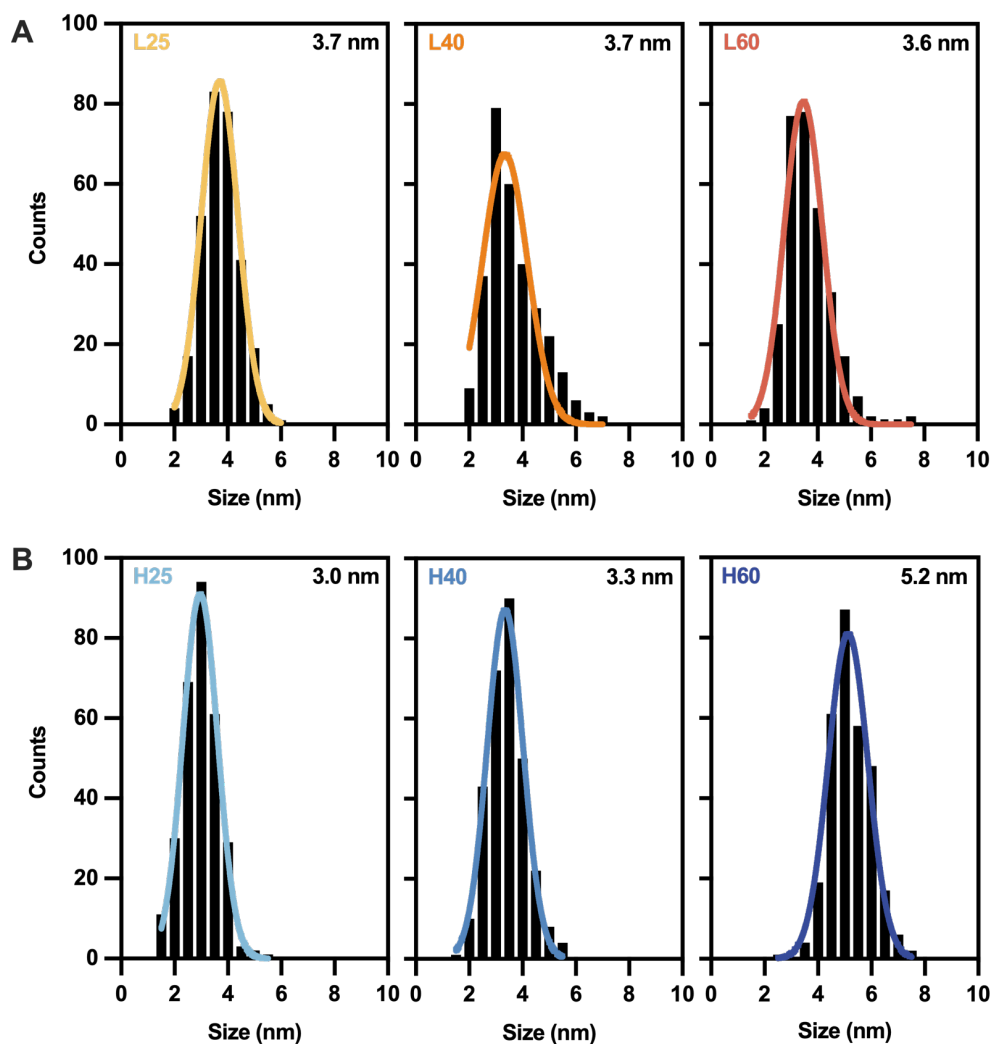

**Figure S8.** Histograms of AuNP sizes determined from TEM images (n = 300). (A) L-series with average sizes of 3.7, 3.7, and 3.6 nm for L25, L40, and L60, respectively. (B) H-series with average sizes of 3.0, 3.3, and 5.2 nm for H25, H40, and H60, respectively.

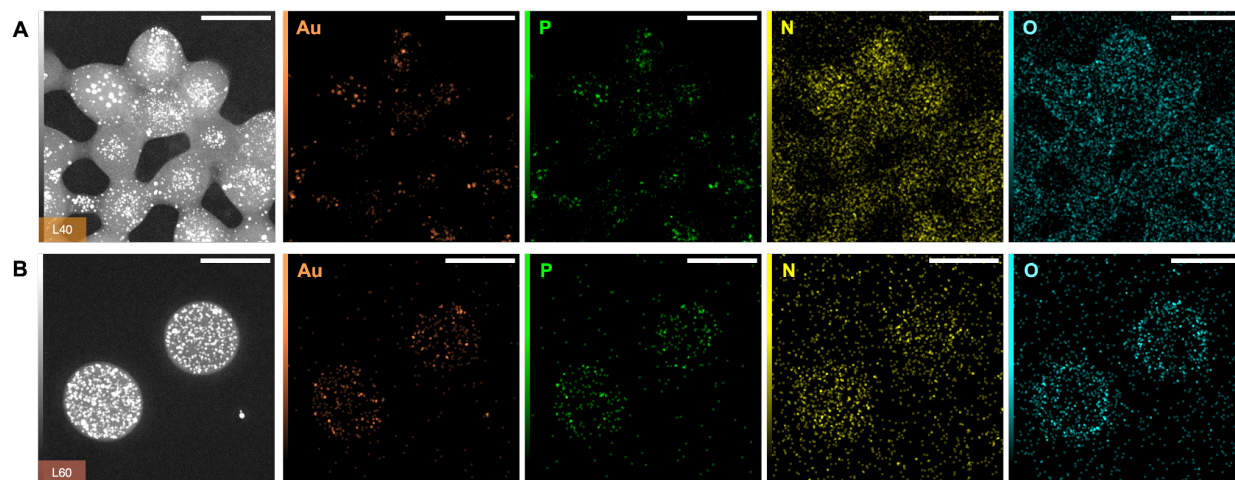

**Figure S9.** Elemental mapping of Au, P, N, and O obtained by energy-dispersive X-ray spectroscopy (EDS). Panels correspond to L40 (A) and L60 (B) (scale bar = 100 nm).

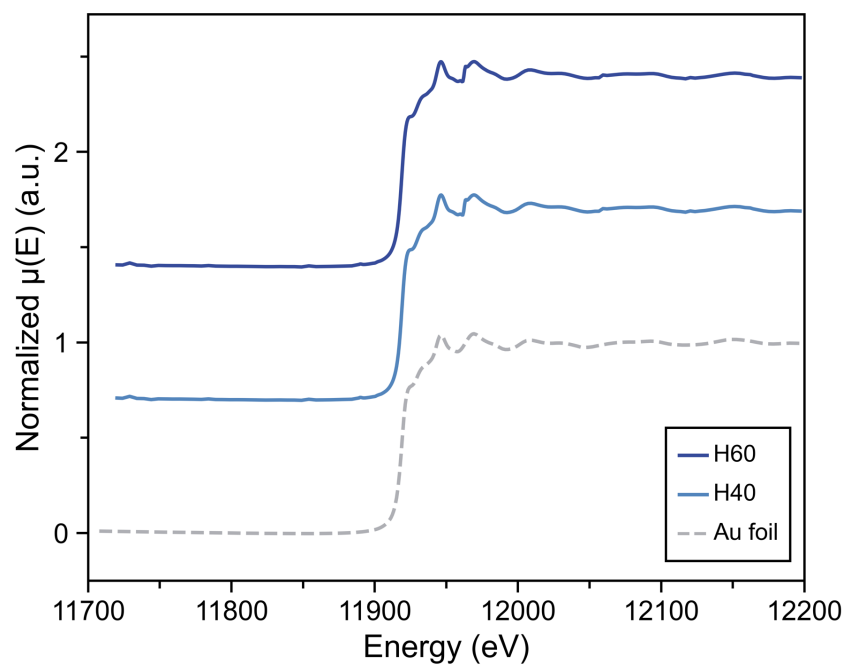

**Figure S10.** Au L<sub>3</sub>-edge XAFS spectra of H40, H60, and Au foil reference.



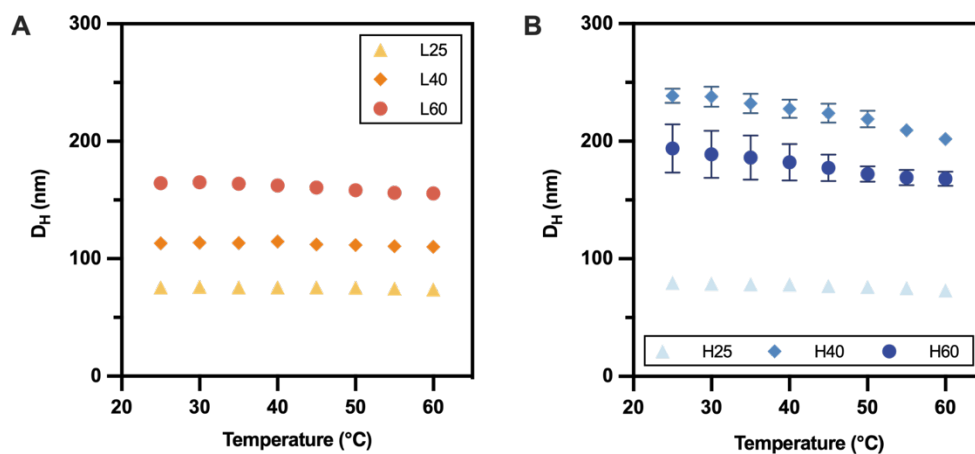

**Figure S11.** Effect of temperature on hydrodynamic diameter ( $D_H$ ) of hybrid nanogels, measured from 25 °C to 60 °C at 5 °C intervals. (A)  $D_H$  of L-series. (B)  $D_H$  of H-series. Error bars represent standard deviation ( $n = 3$ ).

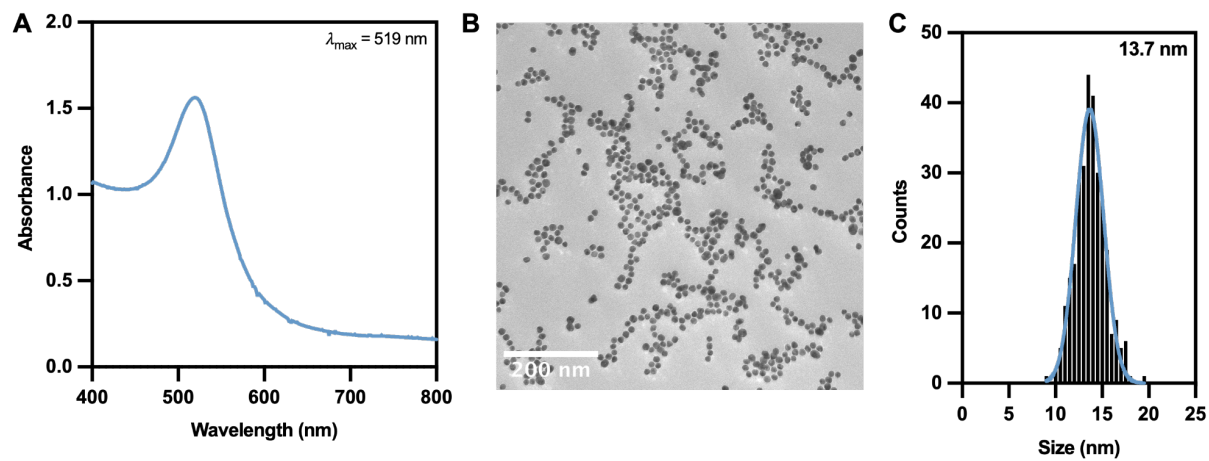

**Figure S12.** Characterization of synthesized citrate-capped AuNPs. (A) UV-Vis spectrum with  $\lambda_{\text{max}}$  at 519 nm. (B) TEM image. (C) Size histogram obtained from TEM images.

**Table S1.** Results obtained from SAXS data fittings using a combined core–shell, sphere, and Guinier model.

| Sample  | Core radius (Å) | Shell thickness (Å) | AuNP radius (Å) | $R_g$ (Å) <sup>[a]</sup> |
|---------|-----------------|---------------------|-----------------|--------------------------|
| 2.5 min | 504             | 71.8                | 10.6            | 646                      |
| 5 min   | 685.8           | 75                  | 10.23           | 859.6                    |
| 10 min  | 636.8           | 300.6               | 12.01           | 74.07                    |

[a] Radius of gyration ( $R_g$ ) was determined from the Guinier term of the fitting models.
